# Supplementary material for: High-level ab initio mapping of the multiple H-abstraction pathways of the OH + glycine reaction
Source: Royal Society of Chemistry journal article supplement (doi:10.1039/d2cp03049g), 2023-01-01
Supplement: d2cp03049g4.pdf [file d2cp03049g4.pdf]

## **ELECTRONIC SUPPLEMENTARY INFORMATION**

### **High-level *ab initio* mapping of the multiple H-abstraction pathways of the OH + glycine reaction**

**Balázs Gruber and Gábor Czako\***

MTA-SZTE Lendület Computational Reaction Dynamics Research Group, Interdisciplinary  
Excellence Centre and Department of Physical Chemistry and Materials Science,  
Institute of Chemistry, University of Szeged,  
Rerrich Béla tér 1, Szeged H-6720, Hungary

\*E-mail: [gczako@chem.u-szeged.hu](mailto:gczako@chem.u-szeged.hu)

**Table S1.** Harmonic frequencies (in  $\text{cm}^{-1}$ ) of the transition states for H-abstraction from the  $\text{CH}_2$  group of glycine obtained at the CCSD(T)-F12b/aug-cc-pVDZ level of theory

| $\text{I}_{\text{CH}}^{\text{TS}}$ | $\text{II}_{\text{CH}}^{\text{TS}}$ | $\text{III}_{\text{CH}}^{\text{TS}}$ | $\text{IV}_{\text{CH}}^{\text{TS}}$ | $\text{V}_{\text{CH}}^{\text{TS}}$ |
|------------------------------------|-------------------------------------|--------------------------------------|-------------------------------------|------------------------------------|
| 1089 <i>i</i>                      | 338 <i>i</i>                        | 547 <i>i</i>                         | 859 <i>i</i>                        | 837 <i>i</i>                       |
| 67                                 | 58                                  | 61                                   | 38                                  | 51                                 |
| 129                                | 92                                  | 107                                  | 109                                 | 84                                 |
| 162                                | 146                                 | 135                                  | 130                                 | 128                                |
| 295                                | 226                                 | 179                                  | 217                                 | 182                                |
| 328                                | 261                                 | 277                                  | 280                                 | 278                                |
| 425                                | 303                                 | 288                                  | 360                                 | 357                                |
| 491                                | 465                                 | 468                                  | 494                                 | 474                                |
| 562                                | 516                                 | 514                                  | 526                                 | 527                                |
| 655                                | 618                                 | 628                                  | 601                                 | 591                                |
| 673                                | 628                                 | 638                                  | 622                                 | 657                                |
| 764                                | 671                                 | 675                                  | 678                                 | 694                                |
| 823                                | 771                                 | 713                                  | 727                                 | 774                                |
| 887                                | 856                                 | 867                                  | 843                                 | 860                                |
| 955                                | 989                                 | 963                                  | 928                                 | 926                                |
| 968                                | 1136                                | 1110                                 | 991                                 | 1089                               |
| 1127                               | 1154                                | 1158                                 | 1157                                | 1125                               |
| 1200                               | 1206                                | 1203                                 | 1196                                | 1205                               |
| 1240                               | 1251                                | 1244                                 | 1230                                | 1248                               |
| 1313                               | 1333                                | 1327                                 | 1330                                | 1329                               |
| 1381                               | 1391                                | 1376                                 | 1369                                | 1368                               |
| 1422                               | 1448                                | 1432                                 | 1425                                | 1415                               |
| 1526                               | 1643                                | 1665                                 | 1628                                | 1624                               |
| 1667                               | 1838                                | 1762                                 | 1668                                | 1671                               |
| 1839                               | 2060                                | 1832                                 | 1807                                | 1824                               |
| 3103                               | 3089                                | 3103                                 | 3110                                | 3139                               |
| 3519                               | 3529                                | 3538                                 | 3555                                | 3534                               |
| 3616                               | 3629                                | 3641                                 | 3651                                | 3625                               |
| 3642                               | 3724                                | 3728                                 | 3703                                | 3713                               |
| 3683                               | 3773                                | 3772                                 | 3764                                | 3775                               |

**Table S2.** Harmonic frequencies (in  $\text{cm}^{-1}$ ) of the product-channel complexes for H-abstraction from the  $\text{CH}_2$  group of glycine obtained at the CCSD(T)-F12b/aug-cc-pVDZ level of theory

| $\mathbf{I}_{\text{CH}}^{\text{MIN}}$ | $\mathbf{II}_{\text{CH}}^{\text{MIN}}$ |
|---------------------------------------|----------------------------------------|
| 51                                    | 52                                     |
| 154                                   | 151                                    |
| 177                                   | 157                                    |
| 194                                   | 193                                    |
| 225                                   | 225                                    |
| 295                                   | 301                                    |
| 315                                   | 310                                    |
| 372                                   | 364                                    |
| 499                                   | 394                                    |
| 504                                   | 511                                    |
| 557                                   | 537                                    |
| 634                                   | 641                                    |
| 702                                   | 690                                    |
| 705                                   | 697                                    |
| 766                                   | 743                                    |
| 914                                   | 918                                    |
| 1145                                  | 1148                                   |
| 1168                                  | 1173                                   |
| 1318                                  | 1315                                   |
| 1357                                  | 1333                                   |
| 1564                                  | 1563                                   |
| 1656                                  | 1657                                   |
| 1711                                  | 1706                                   |
| 1736                                  | 1747                                   |
| 3243                                  | 3211                                   |
| 3443                                  | 3433                                   |
| 3620                                  | 3630                                   |
| 3719                                  | 3717                                   |
| 3798                                  | 3832                                   |
| 3904                                  | 3905                                   |

**Table S3.** Harmonic frequencies (in  $\text{cm}^{-1}$ ) of the transition states for H-abstraction from the  $\text{NH}_2$  group of glycine obtained at the CCSD(T)-F12b/aug-cc-pVDZ level of theory

| $\text{I}_{\text{NH}}^{\text{TS}}$ | $\text{II}_{\text{NH}}^{\text{TS}}$ | $\text{III}_{\text{NH}}^{\text{TS}}$ | $\text{IV}_{\text{NH}}^{\text{TS}}$ | $\text{V}_{\text{NH}}^{\text{TS}}$ |
|------------------------------------|-------------------------------------|--------------------------------------|-------------------------------------|------------------------------------|
| 1395 <i>i</i>                      | 1486 <i>i</i>                       | 1425 <i>i</i>                        | 1593 <i>i</i>                       | 1280 <i>i</i>                      |
| 64                                 | 41                                  | 51                                   | 48                                  | 48                                 |
| 133                                | 114                                 | 101                                  | 134                                 | 60                                 |
| 195                                | 152                                 | 175                                  | 165                                 | 172                                |
| 264                                | 255                                 | 268                                  | 264                                 | 212                                |
| 398                                | 329                                 | 380                                  | 359                                 | 277                                |
| 442                                | 454                                 | 436                                  | 452                                 | 411                                |
| 475                                | 477                                 | 471                                  | 479                                 | 438                                |
| 525                                | 526                                 | 477                                  | 495                                 | 477                                |
| 640                                | 622                                 | 571                                  | 571                                 | 557                                |
| 659                                | 642                                 | 650                                  | 634                                 | 634                                |
| 745                                | 692                                 | 747                                  | 684                                 | 679                                |
| 863                                | 840                                 | 857                                  | 850                                 | 808                                |
| 885                                | 900                                 | 885                                  | 908                                 | 868                                |
| 944                                | 996                                 | 944                                  | 995                                 | 985                                |
| 1114                               | 1102                                | 1111                                 | 1107                                | 1099                               |
| 1173                               | 1172                                | 1167                                 | 1164                                | 1147                               |
| 1190                               | 1233                                | 1188                                 | 1241                                | 1211                               |
| 1307                               | 1248                                | 1300                                 | 1258                                | 1273                               |
| 1339                               | 1335                                | 1335                                 | 1314                                | 1306                               |
| 1419                               | 1451                                | 1394                                 | 1436                                | 1436                               |
| 1460                               | 1465                                | 1453                                 | 1462                                | 1456                               |
| 1507                               | 1509                                | 1505                                 | 1480                                | 1575                               |
| 1741                               | 1609                                | 1731                                 | 1599                                | 1836                               |
| 1821                               | 1824                                | 1849                                 | 1854                                | 1879                               |
| 3039                               | 3001                                | 3014                                 | 2991                                | 3001                               |
| 3114                               | 3077                                | 3089                                 | 3038                                | 3050                               |
| 3495                               | 3502                                | 3484                                 | 3496                                | 3523                               |
| 3746                               | 3708                                | 3741                                 | 3706                                | 3769                               |
| 3771                               | 3767                                | 3811                                 | 3821                                | 3817                               |

**Table S4.** Harmonic frequencies (in  $\text{cm}^{-1}$ ) of the product-channel complexes for H-abstraction from the  $\text{NH}_2$  group of glycine obtained at the CCSD(T)-F12b/aug-cc-pVDZ level of theory

| $\text{I}_{\text{NH}}^{\text{MIN}}$ | $\text{II}_{\text{NH}}^{\text{MIN}}$ | $\text{III}_{\text{NH}}^{\text{MIN}}$ | $\text{IV}_{\text{NH}}^{\text{MIN}}$ | $\text{V}_{\text{NH}}^{\text{MIN}}$ | $\text{VI}_{\text{NH}}^{\text{MIN}}$ | $\text{VII}_{\text{NH}}^{\text{MIN}}$ | $\text{VIII}_{\text{NH}}^{\text{MIN}}$ | $\text{IX}_{\text{NH}}^{\text{MIN}}$ | $\text{X}_{\text{NH}}^{\text{MIN}}$ |
|-------------------------------------|--------------------------------------|---------------------------------------|--------------------------------------|-------------------------------------|--------------------------------------|---------------------------------------|----------------------------------------|--------------------------------------|-------------------------------------|
| 46                                  | 29                                   | 71                                    | 11                                   | 76                                  | 52                                   | 38                                    | 71                                     | 15                                   | 21                                  |
| 73                                  | 76                                   | 131                                   | 48                                   | 103                                 | 80                                   | 71                                    | 99                                     | 82                                   | 68                                  |
| 144                                 | 162                                  | 138                                   | 72                                   | 191                                 | 162                                  | 116                                   | 189                                    | 132                                  | 98                                  |
| 197                                 | 188                                  | 182                                   | 101                                  | 219                                 | 194                                  | 149                                   | 218                                    | 175                                  | 116                                 |
| 256                                 | 266                                  | 217                                   | 155                                  | 253                                 | 254                                  | 173                                   | 241                                    | 244                                  | 142                                 |
| 303                                 | 286                                  | 336                                   | 306                                  | 293                                 | 294                                  | 267                                   | 257                                    | 285                                  | 206                                 |
| 309                                 | 303                                  | 423                                   | 312                                  | 306                                 | 314                                  | 300                                   | 301                                    | 314                                  | 321                                 |
| 366                                 | 363                                  | 441                                   | 385                                  | 411                                 | 415                                  | 380                                   | 408                                    | 400                                  | 351                                 |
| 502                                 | 445                                  | 532                                   | 481                                  | 464                                 | 467                                  | 469                                   | 441                                    | 506                                  | 371                                 |
| 530                                 | 589                                  | 539                                   | 483                                  | 584                                 | 549                                  | 507                                   | 595                                    | 523                                  | 514                                 |
| 623                                 | 629                                  | 592                                   | 566                                  | 661                                 | 608                                  | 532                                   | 674                                    | 539                                  | 535                                 |
| 662                                 | 721                                  | 652                                   | 647                                  | 724                                 | 697                                  | 644                                   | 722                                    | 666                                  | 645                                 |
| 871                                 | 872                                  | 759                                   | 649                                  | 838                                 | 850                                  | 665                                   | 840                                    | 817                                  | 749                                 |
| 880                                 | 881                                  | 864                                   | 864                                  | 886                                 | 863                                  | 860                                   | 893                                    | 861                                  | 855                                 |
| 892                                 | 906                                  | 879                                   | 926                                  | 981                                 | 902                                  | 923                                   | 979                                    | 886                                  | 880                                 |
| 1084                                | 1062                                 | 1076                                  | 1075                                 | 1057                                | 1092                                 | 1087                                  | 1060                                   | 1095                                 | 1063                                |
| 1181                                | 1165                                 | 1153                                  | 1175                                 | 1127                                | 1167                                 | 1176                                  | 1128                                   | 1178                                 | 1130                                |
| 1190                                | 1191                                 | 1195                                  | 1200                                 | 1256                                | 1187                                 | 1193                                  | 1252                                   | 1194                                 | 1174                                |
| 1267                                | 1322                                 | 1285                                  | 1259                                 | 1294                                | 1297                                 | 1293                                  | 1294                                   | 1271                                 | 1261                                |
| 1398                                | 1401                                 | 1385                                  | 1333                                 | 1355                                | 1368                                 | 1348                                  | 1357                                   | 1358                                 | 1389                                |
| 1413                                | 1420                                 | 1403                                  | 1404                                 | 1445                                | 1404                                 | 1429                                  | 1413                                   | 1392                                 | 1392                                |
| 1478                                | 1483                                 | 1437                                  | 1446                                 | 1508                                | 1414                                 | 1439                                  | 1505                                   | 1424                                 | 1418                                |
| 1646                                | 1646                                 | 1673                                  | 1666                                 | 1651                                | 1632                                 | 1647                                  | 1639                                   | 1635                                 | 1650                                |
| 1816                                | 1788                                 | 1836                                  | 1825                                 | 1841                                | 1830                                 | 1813                                  | 1839                                   | 1831                                 | 1859                                |
| 2979                                | 2971                                 | 3005                                  | 3011                                 | 3044                                | 2942                                 | 2957                                  | 3041                                   | 2967                                 | 2995                                |
| 3011                                | 3042                                 | 3033                                  | 3036                                 | 3121                                | 3069                                 | 3083                                  | 3117                                   | 3025                                 | 3040                                |
| 3413                                | 3411                                 | 3468                                  | 3413                                 | 3436                                | 3448                                 | 3400                                  | 3445                                   | 3437                                 | 3460                                |
| 3453                                | 3447                                 | 3615                                  | 3708                                 | 3449                                | 3497                                 | 3766                                  | 3454                                   | 3547                                 | 3613                                |
| 3687                                | 3689                                 | 3701                                  | 3771                                 | 3618                                | 3688                                 | 3770                                  | 3627                                   | 3736                                 | 3814                                |
| 3904                                | 3902                                 | 3915                                  | 3915                                 | 3901                                | 3899                                 | 3917                                  | 3907                                   | 3908                                 | 3923                                |

**Table S4 continues**

| $XI_{NH}^{MIN}$ | $XII_{NH}^{MIN}$ | $XIII_{NH}^{MIN}$ | $XIV_{NH}^{MIN}$ | $XV_{NH}^{MIN}$ | $XVI_{NH}^{MIN}$ | $XVII_{NH}^{MIN}$ | $XVIII_{NH}^{MIN}$ | $XIX_{NH}^{MIN}$ |
|-----------------|------------------|-------------------|------------------|-----------------|------------------|-------------------|--------------------|------------------|
| 21              | 7                | 33                | 25               | 34              | 20               | 30                | 22                 | 38               |
| 47              | 60               | 50                | 60               | 65              | 63               | 60                | 77                 | 78               |
| 62              | 70               | 85                | 68               | 105             | 83               | 73                | 107                | 102              |
| 85              | 141              | 119               | 110              | 132             | 120              | 128               | 155                | 146              |
| 158             | 224              | 151               | 154              | 227             | 131              | 158               | 188                | 234              |
| 290             | 238              | 265               | 260              | 282             | 195              | 311               | 251                | 258              |
| 327             | 308              | 276               | 309              | 344             | 275              | 326               | 273                | 313              |
| 381             | 326              | 337               | 364              | 365             | 320              | 385               | 353                | 340              |
| 468             | 483              | 444               | 469              | 422             | 435              | 456               | 440                | 444              |
| 532             | 486              | 521               | 531              | 443             | 470              | 484               | 478                | 487              |
| 562             | 578              | 546               | 585              | 570             | 552              | 532               | 526                | 537              |
| 605             | 639              | 643               | 613              | 612             | 596              | 570               | 554                | 577              |
| 671             | 640              | 689               | 677              | 746             | 695              | 662               | 658                | 653              |
| 842             | 851              | 859               | 847              | 858             | 847              | 871               | 857                | 855              |
| 916             | 886              | 886               | 883              | 960             | 881              | 926               | 893                | 894              |
| 1080            | 1086             | 1073              | 1081             | 1051            | 1065             | 1074              | 1081               | 1086             |
| 1156            | 1149             | 1156              | 1166             | 1110            | 1144             | 1174              | 1143               | 1142             |
| 1196            | 1189             | 1198              | 1195             | 1218            | 1195             | 1212              | 1200               | 1200             |
| 1272            | 1224             | 1230              | 1239             | 1282            | 1243             | 1262              | 1227               | 1223             |
| 1367            | 1334             | 1345              | 1365             | 1366            | 1355             | 1315              | 1310               | 1310             |
| 1395            | 1399             | 1403              | 1406             | 1385            | 1407             | 1412              | 1406               | 1413             |
| 1431            | 1455             | 1461              | 1440             | 1490            | 1438             | 1423              | 1434               | 1434             |
| 1666            | 1680             | 1660              | 1673             | 1671            | 1651             | 1663              | 1655               | 1679             |
| 1838            | 1850             | 1827              | 1829             | 1823            | 1835             | 1855              | 1873               | 1879             |
| 2954            | 2983             | 2989              | 2974             | 3018            | 2977             | 2992              | 2967               | 2964             |
| 3110            | 3016             | 3035              | 3037             | 3147            | 3050             | 3018              | 3010               | 2999             |
| 3450            | 3436             | 3418              | 3436             | 3411            | 3417             | 3404              | 3428               | 3432             |
| 3713            | 3759             | 3755              | 3726             | 3765            | 3771             | 3718              | 3767               | 3771             |
| 3773            | 3775             | 3767              | 3765             | 3782            | 3800             | 3809              | 3819               | 3816             |
| 3915            | 3902             | 3910              | 3913             | 3882            | 3918             | 3915              | 3900               | 3903             |

**Table S5.** Harmonic frequencies (in  $\text{cm}^{-1}$ ) of the transition states for H-abstraction from the COOH group of glycine obtained at the CCSD(T)-F12b/aug-cc-pVDZ level of theory

| $\text{I}_{\text{COOH}}^{\text{TS}}$ | $\text{II}_{\text{COOH}}^{\text{TS}}$ | $\text{III}_{\text{COOH}}^{\text{TS}}$ | $\text{IV}_{\text{COOH}}^{\text{TS}}$ | $\text{V}_{\text{COOH}}^{\text{TS}}$ |
|--------------------------------------|---------------------------------------|----------------------------------------|---------------------------------------|--------------------------------------|
| 1086 <i>i</i>                        | 1585 <i>i</i>                         | 1124 <i>i</i>                          | 1591 <i>i</i>                         | 1589 <i>i</i>                        |
| 99                                   | 41                                    | 100                                    | 72                                    | 63                                   |
| 208                                  | 122                                   | 203                                    | 137                                   | 133                                  |
| 267                                  | 200                                   | 259                                    | 216                                   | 213                                  |
| 340                                  | 246                                   | 340                                    | 271                                   | 264                                  |
| 396                                  | 394                                   | 396                                    | 338                                   | 341                                  |
| 456                                  | 437                                   | 465                                    | 476                                   | 477                                  |
| 534                                  | 497                                   | 547                                    | 513                                   | 496                                  |
| 563                                  | 567                                   | 562                                    | 547                                   | 545                                  |
| 586                                  | 624                                   | 577                                    | 625                                   | 633                                  |
| 631                                  | 672                                   | 609                                    | 690                                   | 680                                  |
| 670                                  | 730                                   | 665                                    | 770                                   | 767                                  |
| 745                                  | 882                                   | 755                                    | 849                                   | 843                                  |
| 834                                  | 913                                   | 830                                    | 932                                   | 931                                  |
| 937                                  | 953                                   | 954                                    | 1029                                  | 1029                                 |
| 1055                                 | 1156                                  | 1051                                   | 1104                                  | 1105                                 |
| 1090                                 | 1189                                  | 1077                                   | 1190                                  | 1190                                 |
| 1269                                 | 1341                                  | 1300                                   | 1290                                  | 1288                                 |
| 1322                                 | 1389                                  | 1319                                   | 1388                                  | 1388                                 |
| 1343                                 | 1407                                  | 1369                                   | 1470                                  | 1469                                 |
| 1415                                 | 1468                                  | 1439                                   | 1477                                  | 1476                                 |
| 1561                                 | 1490                                  | 1512                                   | 1500                                  | 1499                                 |
| 1604                                 | 1668                                  | 1583                                   | 1634                                  | 1633                                 |
| 1649                                 | 1677                                  | 1623                                   | 1686                                  | 1685                                 |
| 1779                                 | 1715                                  | 1795                                   | 1733                                  | 1729                                 |
| 2303                                 | 3059                                  | 2243                                   | 2978                                  | 2975                                 |
| 3093                                 | 3105                                  | 3092                                   | 3112                                  | 3112                                 |
| 3496                                 | 3516                                  | 3509                                   | 3514                                  | 3515                                 |
| 3688                                 | 3595                                  | 3689                                   | 3605                                  | 3605                                 |
| 3823                                 | 3784                                  | 3833                                   | 3783                                  | 3784                                 |
